# Supplementary material for: Development and assessment of the physical–biogeochemical ocean regional model in the Northwest Pacific: NPRT v1.0 (ROMS v3.9–TOPAZ v2.0)
Source: Copernicus journal article supplement (doi:10.5194/gmd-18-3941-2025), 2025-07-01
Supplement: Supplementary file 2 [file gmd-18-3941-2025-supplement.zip]

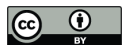

*Supplement of*

**Development and assessment of the physical–biogeochemical ocean regional model in the Northwest Pacific: NPRT v1.0 (ROMS v3.9–TOPAZ v2.0)**

**Daehyuk Kim et al.**

*Correspondence to:* Jae-Hong Moon (jhmoon@jejunu.ac.kr)

- [gmd-18-3941-2025-supplement-title-page.pdf](#)
- [Fig. S1.jpg](#)
- [Fig. S2.jpg](#)
- [Fig. S3.jpg](#)
- [egusphere-2024-1509-supplement.pdf](#)

The copyright of individual parts of the supplement might differ from the article licence.
